# Supplementary figures and images for: Mangiferin inhibits chronic stress-induced tumor growth in colorectal liver metastases via WAVE2 signaling pathway
Source: PubMed Central journal article supplement — Heliyon. 2023 Feb 15;9(3):e13753. doi: 10.1016/j.heliyon.2023.e13753 (PMC9981907; doi:10.1016/j.heliyon.2023.e13753), 2023-02-15

Fig 3B

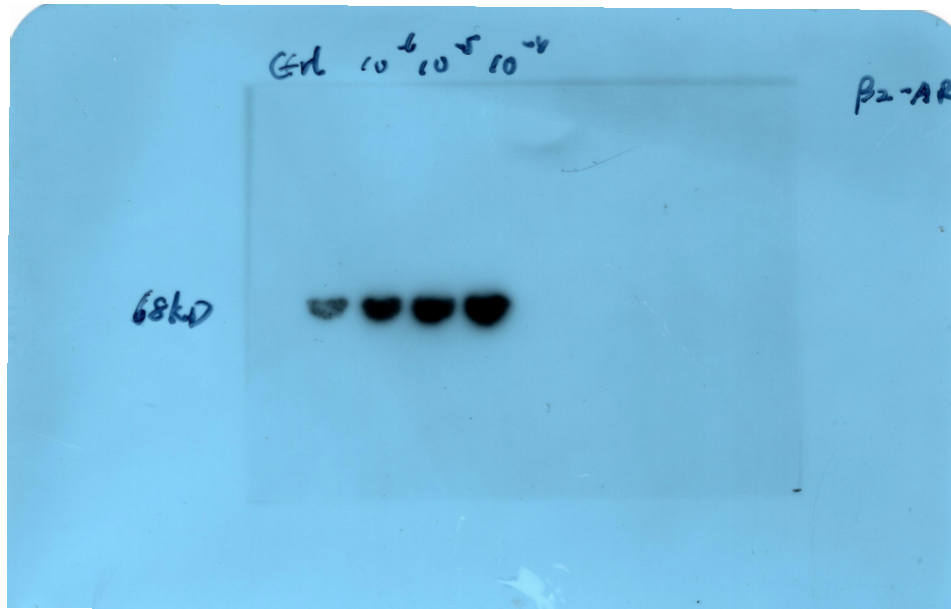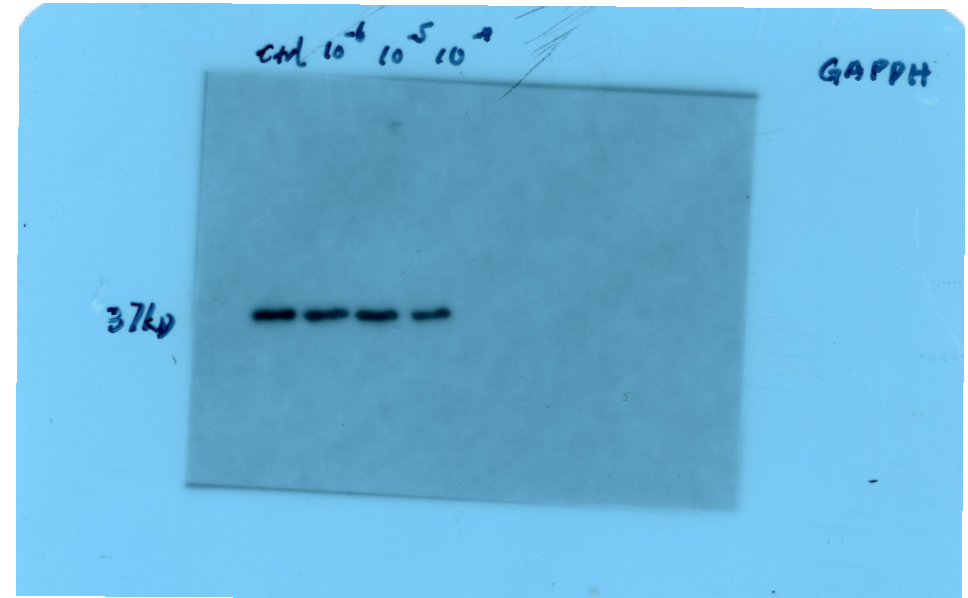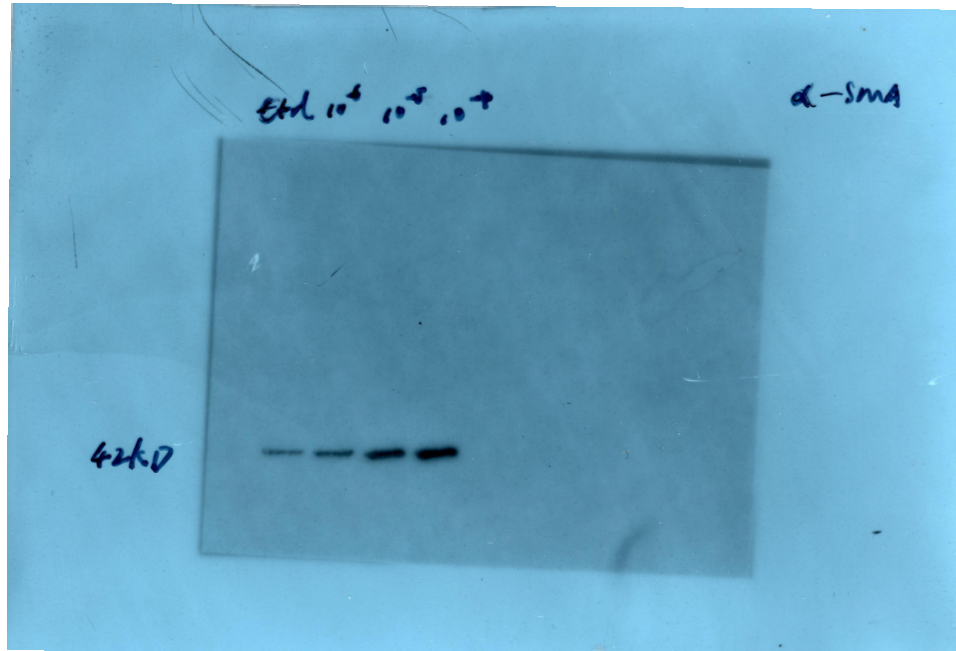

Fig 6B

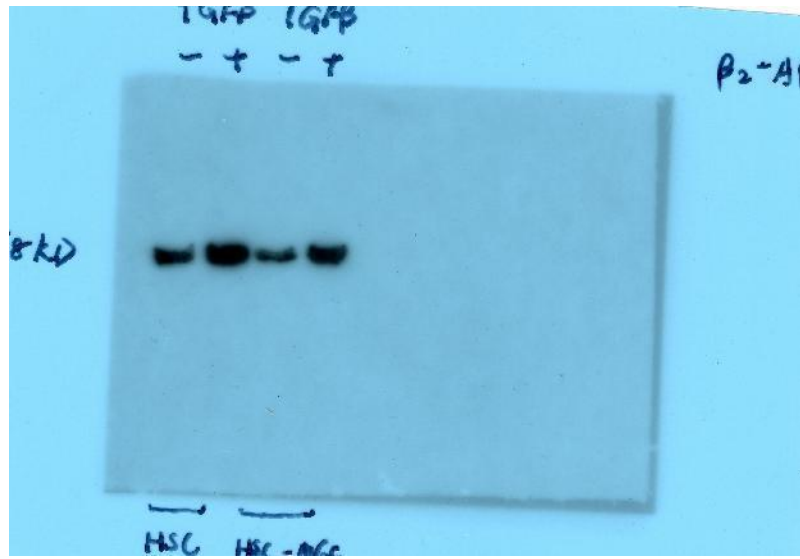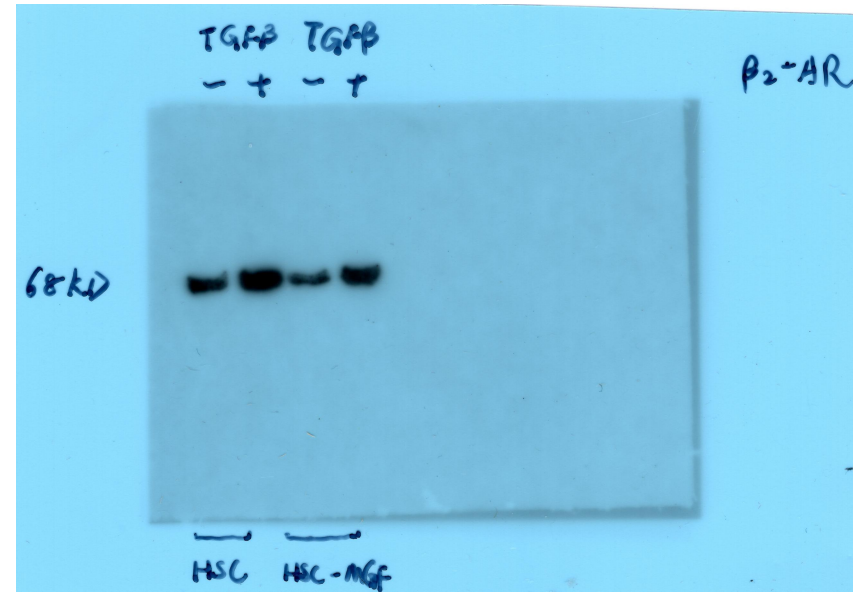

Fig 6B

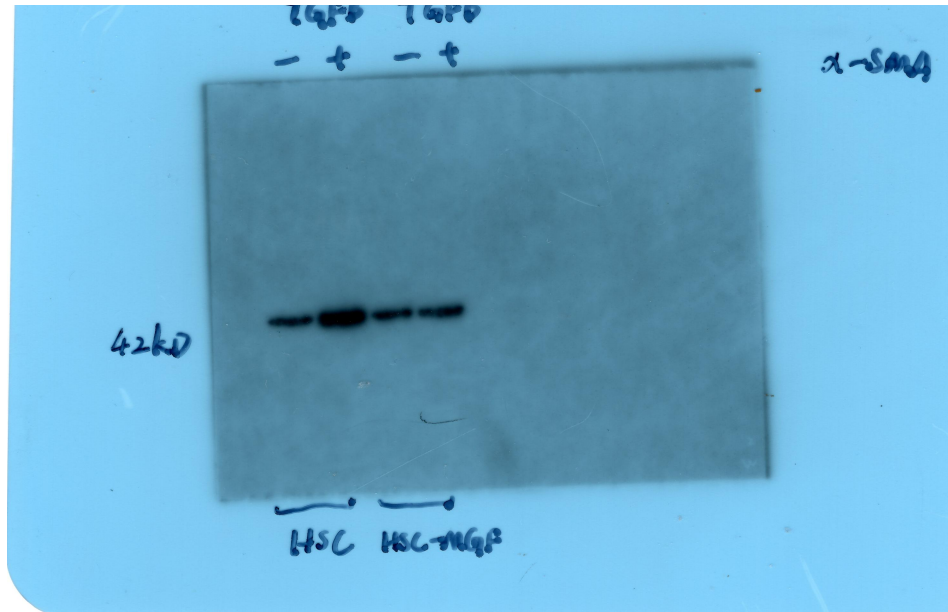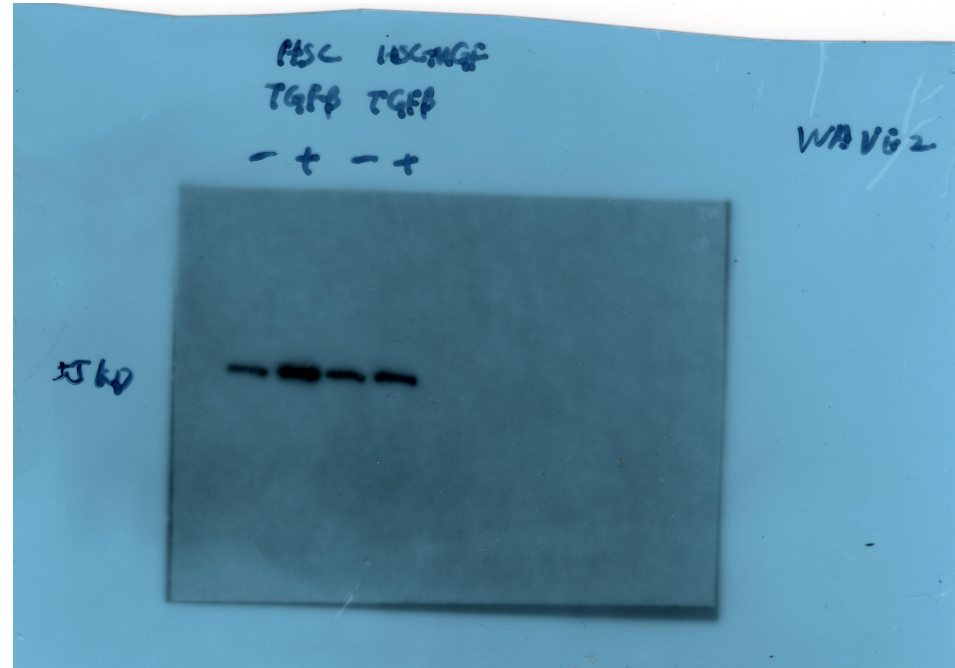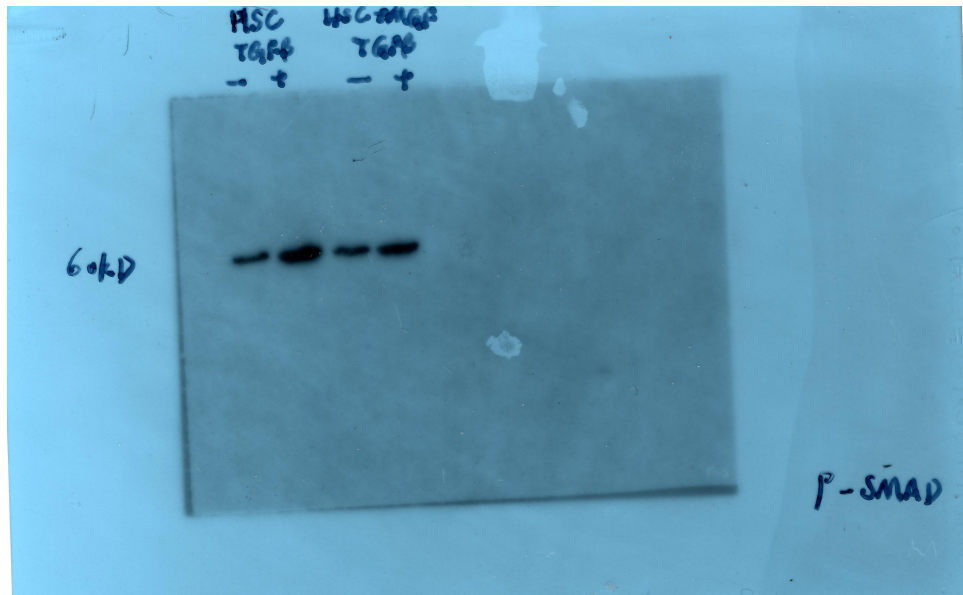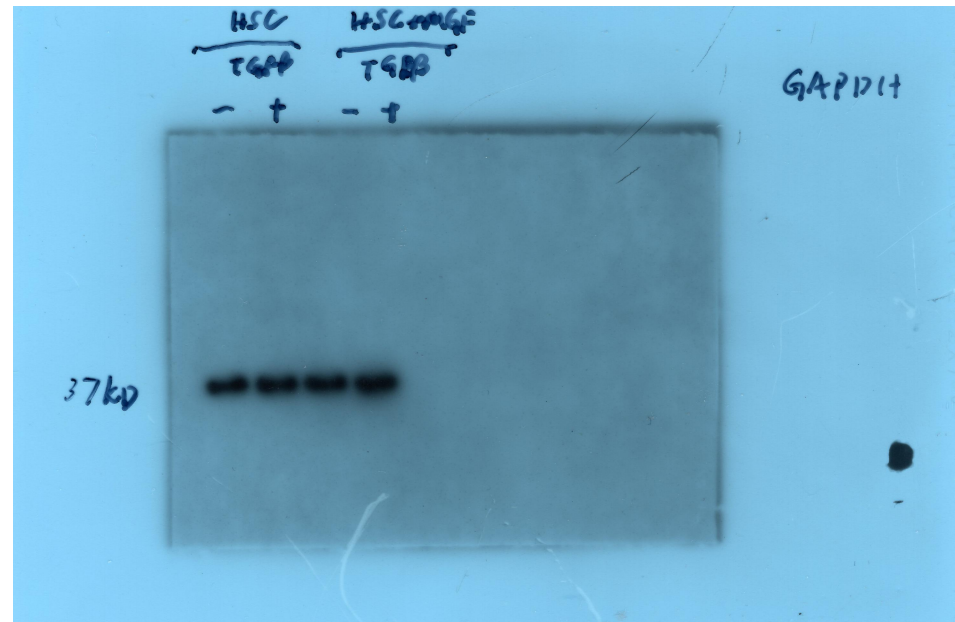

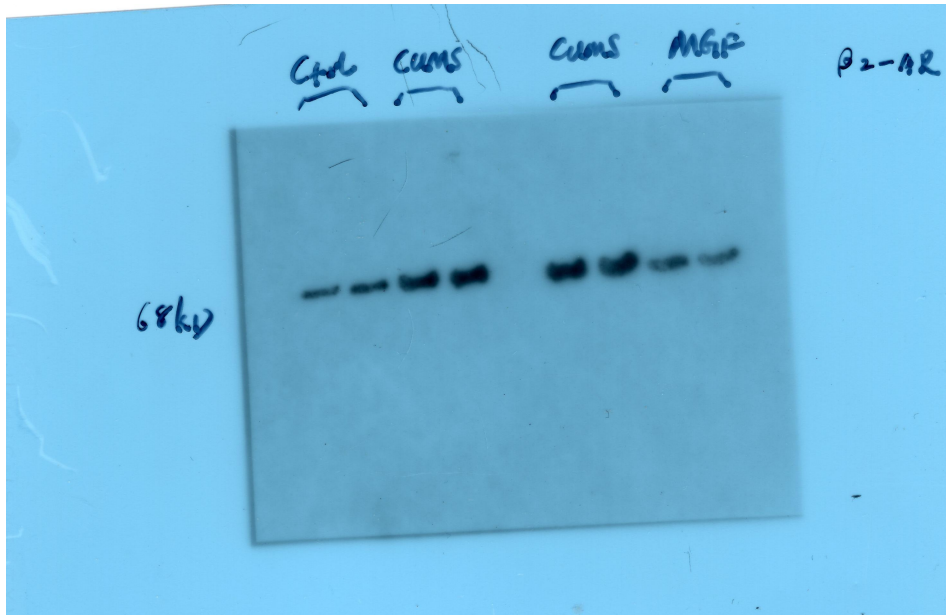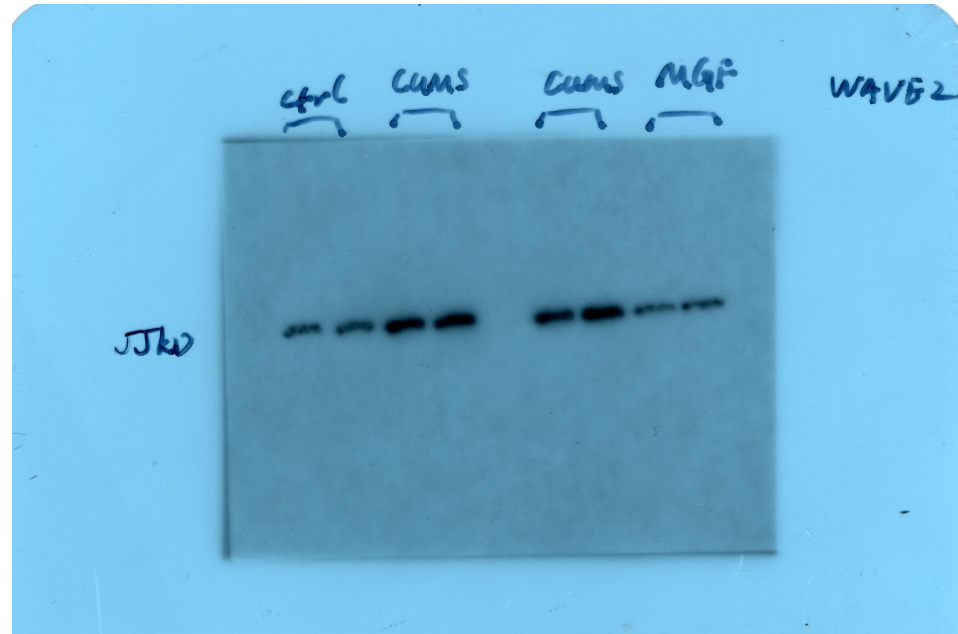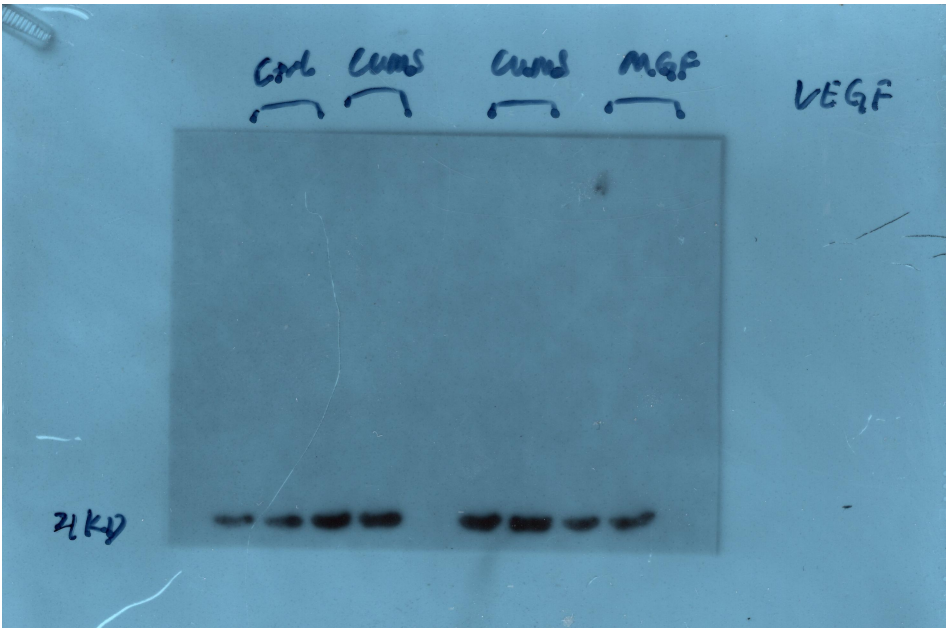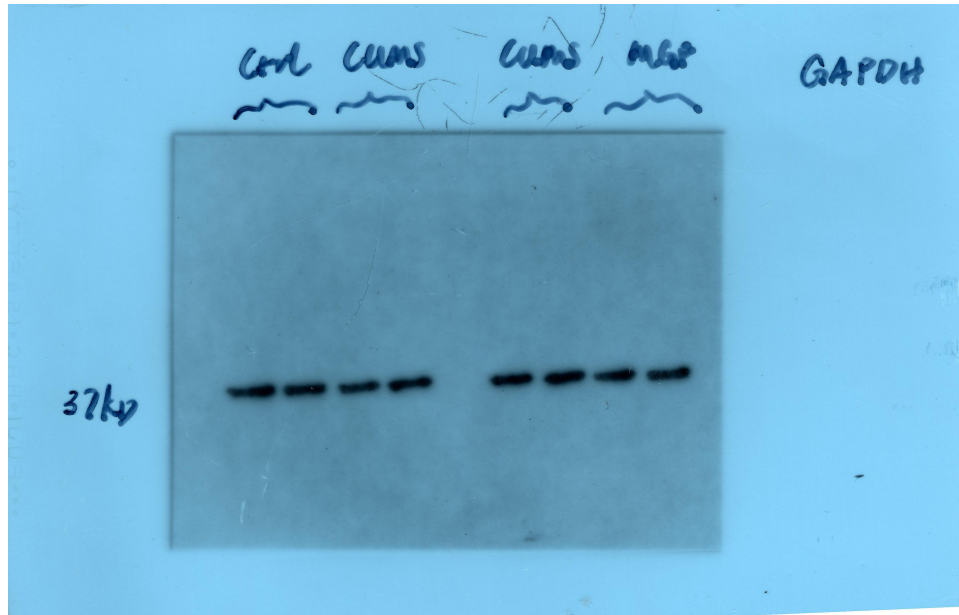

Fig 3C  
& Fig 5E

**Fig 3C  
& Fig 5E**

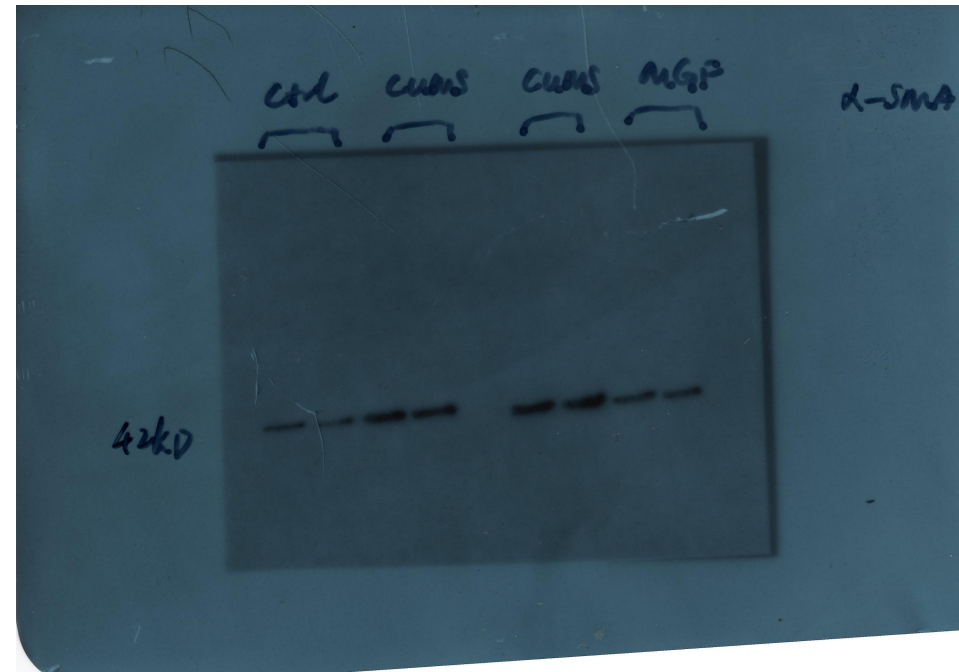

Supplement: mmc1.pdf [file mmc1.pdf]
